# Supplementary material for: Proteomics for Studying the Effects of Ketogenic Diet Against Lithium Chloride/Pilocarpine Induced Epilepsy in Rats
Source: Front Neurosci. 2020 Sep 29;14:562853. doi: 10.3389/fnins.2020.562853 (PMC7550537; doi:10.3389/fnins.2020.562853)
Supplement: Supplementary Table 4 — KEGG pathway enrichment analysis of proteins differing in abundance between SE + KD and SE groups. [file Table_4.XLSX]

## Sheet: all
KEGG pathway	Mapping	Background	All Mapping	All Background	Fold enrichment	Fisher's exact test p value	-log10(p value)	Related proteins
rno04977 Vitamin digestion and absorption	3	4	131	2716	15.55	0.000423554	3.37	A0A0G2JVX7 P04639 G3V7S0
rno00650 Butanoate metabolism	5	17	131	2716	6.1	0.000936414	3.03	Q9WVK7 B2GV06 Q6IMX3 Q9JMI1 Q68G44
rno05143 African trypanosomiasis	5	19	131	2716	5.46	0.00162745	2.79	P04639 A0A0G2JSV6 P01048 P01946 A0A0G2JSW3
rno04610 Complement and coagulation cascades	5	21	131	2716	4.94	0.0026345	2.58	G3V8L7 P01048 F1M957 M0RBJ7 Q5M7T5
rno05322 Systemic lupus erythematosus	5	23	131	2716	4.51	0.00403043	2.39	M0RBJ7 M0RBX6 D3ZXP3 M0RBQ5 P62804
rno05165 Human papillomavirus infection	13	122	131	2716	2.21	0.00504535	2.3	P02454 D4ADV8 F1M957 O08769 F1LST1 P18614 M0RDJ3 Q8R2H0 A0A0G2JSQ0 Q9WVB9 A0A0G2K5E8 P50408 O35147
rno04721 Synaptic vesicle cycle	7	51	131	2716	2.85	0.0101328	1.99	G3V851 D4ABY0 G3V6R0 P28572 P31596 P50408 Q8R2H0
rno05144 Malaria	3	10	131	2716	6.22	0.0102539	1.99	A0A0G2JSV6 P01946 A0A0G2JSW3
rno00604 Glycosphingolipid biosynthesis - ganglio series	2	4	131	2716	10.37	0.0129943	1.89	Q6AYY8 Q641X3
rno00603 Glycosphingolipid biosynthesis - globo and isoglobo series	2	4	131	2716	10.37	0.0129943	1.89	Q641X3 D3ZJF9
rno04512 ECM-receptor interaction	5	34	131	2716	3.05	0.0217971	1.66	P02454 F1M957 F1LST1 A0A0G2K5E8 P18614
rno05202 Transcriptional misregulation in cancer	4	24	131	2716	3.46	0.0259127	1.59	G3V8L7 M0RBX6 O08769 H9N1L3
rno00430 Taurine and hypotaurine metabolism	2	6	131	2716	6.91	0.0304786	1.52	Q64611 A0A1W2Q6L5
rno05217 Basal cell carcinoma	2	6	131	2716	6.91	0.0304786	1.52	D4ADV8 Q9WVB9
rno05140 Leishmaniasis	3	15	131	2716	4.15	0.0325911	1.49	A0A0G2K613 G3V8L7 M0RBJ7
rno05323 Rheumatoid arthritis	3	15	131	2716	4.15	0.0325911	1.49	P07154 P50408 Q8R2H0
rno05226 Gastric cancer	5	39	131	2716	2.66	0.0372535	1.43	D4ADV8 P13109 P14056 O08769 Q9WVB9
rno05414 Dilated cardiomyopathy (DCM)	5	39	131	2716	2.66	0.0372535	1.43	D4A3N4 A0A140TAF0 P01015 P18614 A0A0G2K7F7
rno00072 Synthesis and degradation of ketone bodies	2	7	131	2716	5.92	0.0413389	1.38	B2GV06 Q68G44
rno00280 Valine, leucine and isoleucine degradation	5	41	131	2716	2.53	0.0449346	1.35	Q9WVK7 B2GV06 Q6IMX3 Q9JMI1 Q68G44
